1     **Distinct lung-homing receptor expression and activation profiles**  
2             **on NK cell and T cell subsets in COVID-19 and influenza**

3

4     **Short title: Lung homing receptor expression in respiratory viral infections**

5

6     Demi Brownlie<sup>1</sup>, Inga Rødahl<sup>1</sup>, Renata Varnaite<sup>1</sup>, Hilmir Asgeirsson<sup>2,3</sup>, Hedvig Glans<sup>2,4</sup>, Sara  
7     Falck-Jones<sup>5</sup>, Sindhu Vangeti<sup>5</sup>, Marcus Buggert<sup>1</sup>, Hans-Gustaf Ljunggren<sup>1</sup>, Jakob  
8     Michaëlsson<sup>1</sup>, Sara Gredmark-Russ<sup>1,2</sup>, Anna Smed-Sörensen<sup>5</sup>, Nicole Marquardt<sup>1</sup>

9

10    <sup>1</sup>Center for Infectious Medicine, Department of Medicine Huddinge, Karolinska Institutet,  
11    Stockholm, Sweden

12    <sup>2</sup>Department of Infectious Diseases, Karolinska University Hospital, Stockholm, Sweden

13    <sup>3</sup>Division of Infectious Diseases, Department of Medicine Huddinge, Karolinska Institutet,  
14    Stockholm, Sweden

15    <sup>4</sup>Department of Medicine Solna, Karolinska Institutet, Stockholm, Sweden

16    <sup>5</sup>Division of Immunology and Allergy, Department of Medicine Solna, Karolinska Institutet,  
17    Karolinska University Hospital, Stockholm, Sweden

18

19    **Corresponding author:** Nicole Marquardt, Center for Infectious Medicine, Department of  
20    Medicine, Karolinska Institutet, Stockholm, Sweden. Phone: 0046(0)8 524 843 22

21    E-mail: [Nicole.Marquardt@ki.se](mailto:Nicole.Marquardt@ki.se), ORCID: <https://orcid.org/0000-0003-3186-4752>

## 22 **Abstract**

23 Respiratory viral infections with SARS-CoV-2 or influenza viruses commonly induce a strong  
24 infiltration of immune cells into the lung, with potential detrimental effects on the integrity of  
25 the lung tissue. Despite comprising the largest fractions of circulating lymphocytes in the lung,  
26 little is known about how blood natural killer (NK) cells and T cell subsets are equipped for  
27 lung-homing in COVID-19 and influenza. Using 28-colour flow cytometry and re-analysis of  
28 published RNA-seq datasets, we provide a detailed comparative analysis of NK cells and T  
29 cells in peripheral blood from moderately sick COVID-19 and influenza patients, focusing on  
30 the expression of chemokine receptors known to be involved in leukocyte recruitment to the  
31 lung. The results reveal a predominant role for CXCR3, CXCR6, and CCR5 in COVID-19 and  
32 influenza patients, mirrored by scRNA-seq signatures in peripheral blood and bronchoalveolar  
33 lavage from publicly available datasets. NK cells and T cells expressing lung-homing receptors  
34 displayed stronger phenotypic signs of activation as compared to cells lacking lung-homing  
35 receptors, and activation was overall stronger in influenza as compared to COVID-19.  
36 Together, our results indicate migration of functionally competent CXCR3<sup>+</sup>, CXCR6<sup>+</sup>, and/or  
37 CCR5<sup>+</sup> NK cells and T cells to the lungs in moderate COVID-19 and influenza patients,  
38 identifying potential common targets for future therapeutic interventions in respiratory viral  
39 infections.

40 **Author summary**

41 The composition of in particular CXCR3<sup>+</sup> and/or CXCR6<sup>+</sup> NK cells and T cells is altered in  
42 peripheral blood upon infection with SARS-CoV-2 or influenza virus in patients with moderate  
43 disease. Lung-homing receptor-expression is biased towards phenotypically activated NK cells  
44 and T cells, suggesting a functional role for these cells co-expressing in particular CXCR3  
45 and/or CXCR6 upon homing towards the lung.

46

47 **Key words**

48 NK cells, T cells, chemokine receptors, lung, homing, SARS-CoV-2, COVID-19, influenza  
49 virus

## 50 **Introduction**

51 The ongoing pandemic of coronavirus disease 19 (COVID-19), caused by the novel severe  
52 acute respiratory syndrome coronavirus 2 (SARS-CoV-2), highlights the need for a better  
53 understanding of respiratory viral infections which have the potential to cause recurrent  
54 epidemics or pandemics. In addition to SARS-CoV-2, this also includes influenza virus,  
55 respiratory syncytial virus (RSV), SARS-CoV, and the Middle East Respiratory Syndrome  
56 (MERS)-CoV. Future disease outbreaks with novel viruses affecting the airways are to be  
57 expected and prepared for.

58 During acute infections with respiratory viruses such as with SARS-CoV-2 or influenza,  
59 specific chemokines mediating leukocyte recruitment are increased in the lung and  
60 bronchoalveolar lavage (BAL) fluid. These chemokines include CCL2, CCL3, CCL20,  
61 CXCL1, CXCL3, CXCL10, and IL8, attracting cells expressing chemokine receptors such as  
62 CCR2, CCR5, CXCR3, and CXCR6 (1-3). In patients suffering from severe COVID-19, recent  
63 reports suggest exacerbated lung tissue damage and epithelial cell death resulting from  
64 hyperactivated immune cells, such as inflammatory macrophages (1), natural killer (NK) cells  
65 (4) and/or T cells (1,5). While moderate disease in COVID-19 and in influenza patients is per  
66 definition not fatal, patients may still require hospitalization and/or experience persistent long-  
67 term symptoms such as fatigue, respiratory problems, loss of taste or smell, headache, and  
68 diarrhea. Since lung-homing cytotoxic lymphocytes are likely involved in lung pathology  
69 during acute infection, a better understanding of their major homing mechanisms will help in  
70 developing and improving treatment strategies in COVID-19 and other respiratory viral  
71 infections.

72 In this study, we investigated the composition of NK cell and T cell subsets which are  
73 equipped with lung-homing properties in the peripheral blood of patients suffering from  
74 moderate COVID-19 or influenza, and in healthy controls. In addition to analyses by 28-colour  
75 flow cytometry, we assessed transcript expression in NK cells and T cells using three publicly

76 available single cell (sc)RNA-seq datasets of cells from peripheral blood and bronchoalveolar  
77 lavage, respectively (6-8). Our data indicate a universal role for CXCR3-mediated lung-homing  
78 of NK cells and T cells in COVID-19 and influenza and an additional role for recruitment via  
79 CXCR6 and CCR5.

80 Together, we provide an extensive characterization of the lung-homing potential of  
81 functional NK cells and T cells in homeostasis and acute respiratory viral infections such as  
82 COVID-19 and influenza. The present results are of relevance for the understanding of the  
83 disease progression and for identifying target molecules to improve future therapeutic treatment  
84 strategies.

## 85 **Results**

### 86 **Altered frequencies of chemokine receptor-positive NK cell and T cell subsets in** 87 **peripheral blood in COVID-19 and influenza patients**

88 Chemokine receptors relevant for lung-homing such as CXCR3, CXCR6, CCR2, and CCR5,  
89 could be identified in all detectable NK and T cell subsets in peripheral blood both from healthy  
90 donors and COVID-19 patients (Fig. 1a, b; see Fig. S1a for gating strategies). The frequency  
91 of chemokine receptor-positive NK cell and T cell subsets was decreased in COVID-19 patients  
92 (Fig. 1a, b). Unbiased analysis of single chemokine receptors revealed a loss of CXCR2<sup>+</sup>,  
93 CXCR3<sup>+</sup>, CXCR6<sup>+</sup>, and CCR2<sup>+</sup> cells despite an increase in the frequency of CCR5<sup>+</sup> NK cells  
94 and T cells, respectively (Fig. 1c). When compared to influenza patients, we observed only  
95 minor and non-significant differences for chemokine receptor expression on NK cells in both  
96 diseases (Fig. 1d, e). Notably, a strong trend towards a loss of CXCR3<sup>+</sup> NK cells in COVID-19  
97 and influenza patients was observed (Fig. 1d, e). Lower frequencies of CXCR6<sup>+</sup> NK cells were  
98 accompanied with an increase in CCR5<sup>+</sup>CD56<sup>bright</sup>CD16<sup>-</sup> NK cells in influenza but not in  
99 COVID-19 patients (Fig. 1d, e). In contrast to NK cells, in particular CD8<sup>+</sup> T cells were  
100 significantly affected both in COVID-19 and influenza patients (Fig. 1f, g). Similar to NK cells,  
101 CXCR3<sup>+</sup> T cells were markedly reduced most, both in COVID-19 and influenza. Additionally,  
102 CXCR6<sup>+</sup>CD8<sup>+</sup> T cells were reduced in influenza (Fig. 1f, g). Changes in chemokine receptor  
103 expression were observed both in naïve and non-naïve CD4<sup>+</sup> and CD8<sup>+</sup> T cells (Fig. S2a, b;  
104 gating strategy in Fig. S1a) and likewise when CD8<sup>+</sup> TCM, TEM, and TEMRA cells were  
105 compared (Fig. S2c). Unbiased principal component analysis (PCA) revealed segregation  
106 between healthy controls and influenza patients for NK cells as well as between COVID-19  
107 and influenza patients for T cells, respectively (Fig. 1h-j). The differences were largely driven  
108 by CXCR3 and CCR5 for NK cells and by CCR5 on CD4<sup>+</sup> T cells as well as by CCR2, CXCR3,  
109 and CXCR6 on CD8<sup>+</sup> T cells (Fig. 1i). Together, despite differences between NK cells and  
110 CD8<sup>+</sup> T cells, both lymphocyte subsets displayed a similar pattern in terms of CXCR3 and

111 CXCR6 expression in COVID-19 and influenza patients, with T cells being more strongly  
112 affected.

113 In order to compare the present phenotypic results, with those of other data collections,  
114 we analyzed two publicly available scRNA-seq datasets from peripheral blood from a different  
115 cohort of SARS-CoV-2-infected patients with moderate COVID-19 disease (6) (Fig. 1k) and  
116 from patients infected with either SARS-CoV-2 or influenza A virus (IAV) (7) (Fig. 1l),  
117 respectively. In order to allow a fair comparison of the RNA-seq data to the present dataset, we  
118 selectively analyzed data from patients with similar clinical characteristics. This analysis  
119 revealed differences of chemokine receptor expression between NK cells and T cells at the  
120 mRNA level in peripheral blood. While *CXCR2* was largely confined to NK cells, *CCR2* and  
121 *CCR5* dominated in T cells, both in healthy controls and in COVID-19 patients (Fig. 1k) (6).  
122 Lower average expression of *CXCR3* was found in all three lymphocyte subsets (NK cells,  
123 CD4<sup>+</sup> T cells, CD8<sup>+</sup> T cells) in COVID-19 patients as compared to healthy controls (Fig. 1k).  
124 However, in contrast to protein data, *CXCR6*, *CCR2*, and *CCR5* were strongly increased both  
125 in frequency and in mean intensity in T cells in COVID-19 patients as compared to healthy  
126 controls (Fig. 1k), suggesting post-transcriptional regulation of these chemokine receptors.  
127 Finally, direct comparative analysis of transcript expression of *CXCR2*, *CXCR3*, *CXCR6*, and  
128 *CCR5* revealed stronger loss of *CXCR2*, *CXCR3* and *CXCR6* in NK cells from influenza  
129 patients as compared to COVID-19 patients as well as a trend towards upregulation of *CCR5*  
130 (Fig. 1l) (7), in line with the similarly observed trend at the protein level (Fig. 1d, e) and  
131 suggesting a role for these chemokine receptors particularly in influenza infection. While  
132 *CXCR3*, *CXCR6*, *CCR2*, and *CCR5* are predominantly expressed on CD56<sup>bright</sup>CD16<sup>-</sup> NK cells  
133 in peripheral blood from healthy controls and patients with COVID-19 or influenza,  
134 respectively, *CXCR2* is strongly expressed on CD56<sup>dim</sup>CD16<sup>+</sup> blood NK cells (Fig. S2d, e). In  
135 COVID-19 patients, *CXCR2*<sup>+</sup>CD56<sup>dim</sup>CD16<sup>+</sup> NK cells were mainly lost within the least  
136 differentiated NKG2A<sup>+</sup>CD57<sup>-</sup> subset (Fig. S2f). On T cells, *CXCR2* expression was overall

137 low, without significant differences between healthy controls and COVID-19 patients (Fig.  
138 S2g, h).

139 Together, the present phenotypic analyses indicate that CXCR3 is a common lung-  
140 homing receptor for both NK cells and T cell subsets during acute infection with COVID-19 or  
141 influenza, despite major differences for *CXCR6*, *CCR2*, and *CCR5* between the two diseases at  
142 transcriptional level. Furthermore, CXCR6<sup>+</sup> NK and T cells were strongly affected in influenza  
143 but not in COVID-19 patients, indicating potential differences in homing capacities in the two  
144 diseases.

145

#### 146 **Activation profiles in chemokine-receptor positive NK cells differ in COVID-19 and** 147 **influenza**

148 We and others previously demonstrated an activated phenotype in peripheral blood NK  
149 cells and T cells in COVID-19 and influenza, respectively (4,9,10). Here, we aimed at  
150 identifying NK and T cell activation markers in relation to expression of lung-homing receptors  
151 as identified by boolean gating, combining cells expressing either CXCR3, CXCR6, CCR2, or  
152 CCR5 (Fig. S1b, c). Expression of activation markers such as CD69, CD38, Ki67, and NKG2D  
153 was elevated on NK cells in moderate COVID-19 patients (Fig. 2a, b), with strongest increases  
154 detected for CD69 and Ki67 (Fig. 2b, c). In detail, induction of CD69 expression was highest  
155 on CD56<sup>bright</sup>CD16<sup>-</sup> NK cells co-expressing lung-homing receptors, while Ki67 induction was  
156 highest in corresponding CD56<sup>dim</sup>CD16<sup>+</sup> NK cells, particularly in those co-expressing lung-  
157 homing receptors (Fig. 2c). Due to very low numbers of CD56<sup>bright</sup>CD16<sup>-</sup> NK cells lacking any  
158 relevant chemokine receptor in healthy controls, no comparisons could be performed for this  
159 subset. In contrast to NK cells from COVID-19 patients, upregulation of CD69 was highest in  
160 CD56<sup>dim</sup>CD16<sup>+</sup> NK cells in influenza patients, irrespective of co-expression of lung-homing  
161 receptors (Fig. 2d, e, f). Expression and upregulation of CD38 was similar in COVID-19 and  
162 influenza patients (Fig 2c, f). While these data indicate fundamental differences in activation



163 patterns for NK cells in COVID-19 and influenza patients, other phenotypic characteristics  
164 remained stable between the two diseases (Fig. S3a, b), despite induction of granzymes and  
165 perforin observed in particular in chemokine receptor-positive CD56<sup>bright</sup>CD16<sup>-</sup> NK cells (Fig.  
166 S3c-f). In the latter subset, upregulation of perforin expression was three times higher in  
167 influenza patients as compared to COVID-19 patients (Fig. S3e, f), indicating stronger  
168 activation of blood NK cells in influenza.

169 As indicated by transcript level, CXCR2 might have an additional role in lung-homing  
170 for NK cells. Since activation affected both CD56<sup>dim</sup> and CD56<sup>bright</sup> NK cells in COVID-19  
171 patients, we next sought to determine changes in CXCR2<sup>+</sup> expression (Fig. 2g, h). In this regard,  
172 expression of CXCR2 was higher on CD56<sup>dim</sup>CD16<sup>+</sup> NK cells lacking other lung-homing  
173 receptors (Fig. 2g). The frequency of this CXCR2<sup>+</sup>CD56<sup>dim</sup>CD16<sup>+</sup> NK cell subset was  
174 significantly reduced in COVID-19 patients as compared to healthy controls (Fig. 2h),  
175 indicating an alternative migration mechanism for CXCR2<sup>+</sup>CD56<sup>dim</sup>CD16<sup>+</sup> NK cells to the lung  
176 in COVID-19 patients.

177 Together, our data show that the activation patterns differ for NK cell subsets in  
178 COVID-19 and influenza patients, respectively, with generally stronger activation of blood NK  
179 cells in influenza as compared to moderate COVID-19 patients. Furthermore, the data suggest  
180 that CXCR2 might act as an alternative lung-homing receptor for CD56<sup>dim</sup>CD16<sup>+</sup> NK cells  
181 lacking other lung-homing receptors.

182

### 183 **Biased activation of T cells co-expressing lung-homing receptors in COVID-19 and** 184 **influenza**

185 Since NK cell subset activation in COVID-19 and influenza is associated with  
186 chemokine receptor expression, we next determined whether T cells expressing lung-homing  
187 receptors displayed an equivalent phenotypic bias towards stronger activation of chemokine  
188 receptor-positive T cells (Fig. 3). Similar to NK cells, a larger proportion of CD4<sup>+</sup> and CD8<sup>+</sup> T

189 cells expressed CD69, both in COVID-19 (Fig. 3a, c) and influenza (Fig. 3b, c) compared to  
190 healthy controls. While in COVID-19 patients CD69 upregulation was biased towards CD8<sup>+</sup> T  
191 cells co-expressing lung-homing receptors (Fig. 3a, c), upregulation was overall higher and  
192 more uniform between the T cell subsets in influenza (Fig. 3b, c). Furthermore, CD38 was  
193 strongly upregulated on CD8<sup>+</sup> T cells in influenza but not COVID-19 patients (Fig. 3c). Finally,  
194 expression of Ki67 was largely confined to chemokine receptor-positive T cells, both in healthy  
195 controls and in COVID-19 patients (Fig. 3a). Upregulation of Ki67 was strongest in chemokine  
196 receptor-positive CD8<sup>+</sup> T cells (Fig. 3c), which is in line with strongest upregulation in  
197 CD56<sup>dim</sup>CD16<sup>+</sup> chemokine receptor-positive NK cells (Fig. 2c), indicating a particular  
198 activation of cytotoxic lymphocytes expressing lung-homing receptors in COVID-19 patients.

199 In comparison to NK cells where upregulation of granzymes and perforin was more  
200 uniform between COVID-19 and influenza patients (Fig. S3), differences were more distinct  
201 for T cells (Fig. 3d-f). As to be expected, expression of cytotoxic effector molecules was to a  
202 large extent contained to cytotoxic CD8<sup>+</sup> T cells (Fig. 3d, f), although some expression was also  
203 observed in CD4<sup>+</sup> T cells both in COVID-19 and influenza patients, respectively, with a  
204 particular bias towards chemokine receptor-negative CD4<sup>+</sup> T cells (Fig. 3e, f). Expression of  
205 granzyme B and perforin was highest in chemokine receptor-negative CD8<sup>+</sup> T cells in healthy  
206 controls as well as in COVID-19 and influenza patients (Fig. 3d, e). Importantly, however,  
207 lung-homing receptor-positive T cells displayed the highest increase compared to the same  
208 subset in healthy controls (Fig. 3f).

209 Together, these data indicate an overall stronger *in vivo* priming of T cells and NK cells  
210 in influenza patients as compared to moderate COVID-19 patients and also suggest a specific  
211 role for cytotoxic lymphocytes co-expressing lung-homing receptors.

212

213 **Distinct CXCR3- and CXCR6-mediated accumulation of phenotypically primed NK cells**  
214 **and T cells in BAL fluid of COVID-19 patients**

215           Activation of cytotoxic NK cells and CD8<sup>+</sup> T cells in COVID-19 and influenza patients  
216 was associated with high expression of effector molecules (Fig. S3, Fig. 3). Stratification of  
217 cells based on expression of chemokine receptors, granzyme A, granzyme B, and perforin  
218 revealed distinct co-expression patterns between CD56<sup>bright</sup>CD16<sup>-</sup> and CD56<sup>dim</sup>CD16<sup>+</sup> NK cells  
219 and CD8<sup>+</sup> T cells as well as between COVID-19 and influenza (Fig. 4a). Shared between the  
220 different subsets and between COVID-19 and influenza was an increase of all effector  
221 molecules particularly on chemokine receptor-positive cells. Increased expression of effector  
222 molecules could also be confirmed at transcriptional level both for NK cells (Fig. 4b) and CD8<sup>+</sup>  
223 T cells (Fig. 4c) in peripheral blood of COVID-19 patients as compared to healthy controls (6).  
224 Interestingly, levels of effector molecules gene transcripts were nearly identical between  
225 ventilated (severe) and non-ventilated (moderate) COVID-19 patients, both in NK cells (Fig.  
226 4b) and CD8<sup>+</sup> T cells (Fig. 4c), indicating that similar NK and T cell activation is similar in  
227 patients with moderate and severe disease.

228           The loss of NK cells and T cells expressing lung-homing receptors in the peripheral  
229 blood of COVID-19 patients suggests migration of the respective cells to the infected lung  
230 tissue. In order to identify characteristics of NK cells and T cells in the lung, we next used a  
231 publicly available scRNAseq dataset from BAL fluid cells from COVID-19 patients (8) and  
232 analyzed expression of transcripts of relevant chemokines in total BAL cells (Fig. 4d) as well  
233 as chemokine receptor expression on NK cells and CD8<sup>+</sup> T cells (Fig. 4e). High transcript levels  
234 of a large number of chemokines were found in patients with severe disease, while moderate  
235 patients were mainly distinguished from healthy patients by a significantly upregulated  
236 expression of *CXCL10* and *CCL5*, in addition to increased levels of *CXCL11* and *CXCL16* (Fig.  
237 4d), highlighting the role for CXCR3, CXCR6, and CCR5 in moderate COVID-19. In line with  
238 these results, transcripts for *CXCR3*, *CXCR6*, and *CCR5* were highly enriched in NK cells as  
239 well as CD4<sup>+</sup> and CD8<sup>+</sup> T cells in COVID-19 patients with moderate disease (Fig. 4e).  
240 Although it is possible that some of the cells in BAL fluid are comprised of tissue-resident NK

241 cells and memory T cells which express high levels of CXCR3 and CXCR6 at the  
242 transcriptional and protein levels (11,12), our data strongly suggest infiltration of NK cells and  
243 T cells from peripheral blood into the lung in COVID-19 patients. Since NK cells and CD8<sup>+</sup> T  
244 cells from peripheral blood displayed upregulated levels of effector molecules, these cells might  
245 have important cytotoxic implications upon infiltration into the lung. Indeed, NK cells and  
246 CD8<sup>+</sup> T cells in BAL fluid from COVID-19 patients displayed increased expression levels of  
247 *GZMA*, *GZMB*, and *PRF1* in patients with moderate and severe disease (Fig. 4e, f). We  
248 previously demonstrated that exposure to IAV-infected cells functionally primes human blood  
249 and lung NK cells *in vitro* towards increased target cell-responsiveness (9). However, despite  
250 phenotypic activation and upregulation of effector molecules both at RNA and protein levels,  
251 blood NK cells from patients with moderate COVID-19 showed no elevated responses to K562  
252 target cells as compared to healthy controls (Fig. 4h, i). Instead, NK cell responses were slightly  
253 reduced with time after symptom onset (Fig. 4j). While our data suggest a low state of NK cell  
254 activation in peripheral blood of patients with moderate COVID-19, it remains to be determined  
255 whether NK cells migrating towards the lungs remain functional and contribute to lysis of virus-  
256 infected cells and possibly even to tissue pathology in patients with moderate or severe COVID-  
257 19.

258 Altogether, our data suggest distinct recruitment of CXCR3<sup>+</sup> and CXCR6<sup>+</sup> NK cells and  
259 CD8<sup>+</sup> T cells to the lung in patients with moderate COVID-19 and influenza, indicating  
260 overlapping recruitment mechanisms in these two respiratory viral infections. Hence, a better  
261 understanding of lung-homing of innate and adaptive cytotoxic lymphocytes in COVID-19 and  
262 influenza patients might reveal universal concepts of disease progression in these two, and  
263 possibly other, respiratory viral infections.

## 264 **Discussion**

265 The COVID-19 pandemic has raised the awareness about the need for a better understanding  
266 of the course of respiratory viral infections. So far, only a few studies have compared immune  
267 responses in COVID-19 and other respiratory viral infections side by side (13) (14,15). Here,  
268 we compared COVID-19 with influenza. Both viruses are to different degrees transmitted by  
269 contact, droplets and fomites. They cause respiratory disease with similar disease presentation  
270 ranging from asymptomatic or mild to severe disease and death. Here, we demonstrate that NK  
271 cells and T cells, in particular CD8<sup>+</sup> T cells, largely overlap in their chemokine receptor  
272 expression profile in the blood of COVID-19 and influenza, indicating similar lung-homing  
273 mechanisms for cytotoxic lymphocytes in both infections. We identified a stronger loss of  
274 CXCR3<sup>+</sup> and CXCR6<sup>+</sup> CD8<sup>+</sup> T cells, overall stronger activation of NK cells and T cells, as well  
275 as reduced transcript level expression of lung-homing receptors in the blood of influenza  
276 patients as compared to COVID-19 patients with moderate disease, in line with the recent  
277 observation of a lower inflammatory profile in COVID-19 patients as compared to influenza  
278 patients (14). The activated profile of NK cells and CD8<sup>+</sup> T cells, including elevated expression  
279 of CD69 and Ki67, and induction of perforin, was biased towards subsets co-expressing one or  
280 more of the lung-homing receptors CXCR2, CXCR3, CXCR6, CCR2, or CCR5. Levels of  
281 corresponding leukocyte-recruiting chemokines such as IL-8, CCL5, CXCL1, CXCL2,  
282 CXCL5, and CXCL10 (IP-10), are elevated in the BAL fluid of patients infected with SARS-  
283 CoV-2 (16,17). Monocytes producing ligands for CXCR3 have been shown to be expanded in  
284 the lungs of COVID-19 patients (8). Data regarding chemokine expression in the lung in  
285 influenza are limited to patients with fatal outcome (2). However, in particular CXCL10 has  
286 been shown to be upregulated in serum of influenza patients (18,19) and in SARS-CoV-1  
287 patients with ARDS (20), in *in vitro* influenza virus-infected human macrophages (21), in  
288 human lung tissue explants infected with SARS-CoV-2 (16), and in the lungs of mice infected  
289 with influenza virus (3,22,23), suggesting a predominant role for the CXCR3: CXCL10 axis for

290 lung-homing upon respiratory viral infection and, interestingly, also in non-viral lung tissue  
291 injury (24). Elevated CXCL10 levels in BAL was associated with longer duration of mechanical  
292 ventilation in COVID-19 patients (17). In mice, CXCR3-deficiency rescued CCR5-deficient  
293 mice from IAV-induced mortality (25). Other murine IAV infection models demonstrated a  
294 role for CXCR3 and CCR5 for NK cell lung-homing and showed NK cell accumulation in the  
295 lung was not due to proliferation or apoptosis (23). For CD8<sup>+</sup> T cells, murine models  
296 demonstrated that virus-specific T cells express CXCR3 and migrate to CXCR3 ligands *in vitro*  
297 (26). Furthermore, CCR5 is required for recruitment of memory CD8<sup>+</sup> T cells to IAV-infected  
298 epithelium and is rapidly upregulated on the surface of memory CD8<sup>+</sup> T cells upon viral  
299 challenge (26). Interestingly, these mouse models also revealed that CCR5 is required for  
300 circulating CD8<sup>+</sup> memory T cells to migrate to respiratory airways but not lung parenchyma  
301 during virus challenge (26), indicating potential distinct migration patterns depending on  
302 chemokine receptor expression. In addition to CCR5 and CXCR3, CXCR6 has been suggested  
303 to be of importance for recruitment of resident memory T cells to the airways both in mice (12)  
304 and in moderate COVID-19 (8).

305         The relevance of the CXCR3: CXCL10 axis for lung tissue-homing of cytotoxic immune  
306 cells such as NK cells and CD8<sup>+</sup> T cells might be of interest for future approaches of  
307 intervention. Antibody-mediated targeting of CXCL10 improved survival of H1N1-infected  
308 mice (27), revealing a novel approach for immunotherapy in patients with severe respiratory  
309 viral infections. A thorough review recently summarized relevant known factors and cells  
310 involved in lung-homing during infection with SARS-CoV-2 and influenza, emphasizing the  
311 role of circulating NK cells not only in terms of their cytotoxic potential but also in potentially  
312 facilitating the recruitment of other cell types such as neutrophils (28). The potential  
313 immunoregulatory roles of NK cells in the human lung in health and disease however remains  
314 to be studied further.

315           Despite the parallels between SARS-CoV-2 and influenza virus infection, both diseases  
316 differ at an immunological level including that SARS-CoV-2 does not infect NK cells or other  
317 mononuclear blood cells due to the lack of ACE2 expression (29), while influenza virus can  
318 infect NK cells (30). In contrast to influenza virus, SARS-CoV-2 can spread to other organs if  
319 not cleared efficiently from the respiratory tract (31), and the viruses induce different antiviral  
320 responses in lung epithelial cells (32).

321           Here, we demonstrate common lung-homing potential of circulating NK cells and CD8<sup>+</sup>  
322 T cells in SARS-CoV-2 and influenza patients. A shortcoming of our study is a low number of  
323 patients, impeding a detailed stratification by clinical or other parameters. However, the present  
324 cohort was limited to clinically well-defined patients with moderate disease. Future studies will  
325 assess how acute respiratory viral infection with SARS-CoV-2, influenza viruses, and other  
326 viruses affects the landscape of activated NK cells and T cells in the lung.

327           Together, our results strongly implicate an importance of CXCR3 as a lung-homing  
328 receptor in respiratory viral infections such as SARS-CoV-2 and influenza virus in humans.  
329 The results also reveal a role for other receptors such as CXCR6, CCR5 on CD56<sup>bright</sup>CD16<sup>-</sup>  
330 NK cells, as well as CXCR2 on CD56<sup>dim</sup>CD16<sup>+</sup> NK cells, as potential alternative receptors of  
331 importance. A better understanding of how these chemokine receptors are affecting disease  
332 progression might help to develop future immunotherapeutic interventions in patients that  
333 developed disease in current or future epidemics or pandemics with respiratory viral infections.



## 334 **Material and Methods**

### 335 **Patients and processing of peripheral blood**

336 We enrolled a total of 10 hospitalized patients (four females and six males; age range 24-70;  
337 average age 55.3) who were diagnosed with COVID-19 by RT-qPCR for SARS-CoV-2 in  
338 respiratory samples. Patients were sampled on average 11 days (range 6-16) after symptom  
339 onset. All of the COVID-19 patients were considered ‘moderate’ based on the guidelines for  
340 diagnosis and treatment of COVID-19 (Version 7) released by the National Health Commission  
341 and State Administration of Traditional Chinese Medicine (33). Furthermore, we enrolled 18  
342 patients who tested positive for IAV (n=12) or IBV (n=6) (nine females and nine males; age  
343 range 21-84; median age 45) by RT-qPCR who were recruited during the four months  
344 immediately preceding the outbreak of COVID-19 in the Stockholm region. Nine of the 18  
345 influenza patients were hospitalized.

346 None of the COVID-19 patients and only one of the influenza patients received  
347 immunosuppressive treatment. Diagnostics for all patients were performed at the diagnostic  
348 laboratory at the Karolinska University Hospital, Stockholm, Sweden. Patients were sampled  
349 on average 5 days (range 1-11) after symptom onset. Mononuclear cells from peripheral blood  
350 were isolated by density gradient centrifugation (Lymphoprep). For each of the two separate  
351 cohorts, blood was collected from healthy blood donors and processed in parallel with patient  
352 samples.

353 The study was approved by the Regional Ethical Review Board in Stockholm, Sweden,  
354 and by the Swedish Ethical Review Authority. All donors provided informed written consent  
355 prior to blood sampling.

356

### 357 **Transcriptome analysis**

358 Preprocessed and annotated scRNA-seq datasets of cells from peripheral blood and BAL fluid  
359 from healthy controls, COVID patients, and influenza patients were obtained in RDS formats



360 from published data (6-8). The data was read and analyzed using Seurat (v3.2.2). Quality  
361 filtering and cell and cluster annotations were retained from the respective publications. The  
362 datasets were scaled and transformed using the SCTransform function with mitochondrial gene  
363 expression regressed out, this was repeated after excluding populations and groups.  
364 Differentially expressed genes present in at least 25% of the cells were determined in a pairwise  
365 manner comparing patient groups using the sctransform outcome and the FindMarkers function  
366 implemented in Seurat. NK cells and T cell subsets were selected separately and analyzed based  
367 on patient group for transcript expression of chemokine receptors and effector molecules. CD4<sup>+</sup>  
368 T cells and CD8<sup>+</sup> T cells were identified from the BAL T cell subset based on expression of  
369 CD4 and CD8. NK cells and T cell populations were further studied in only moderate and non-  
370 ventilated COVID patients in the datasets from peripheral blood and BAL fluid, respectively.

371

### 372 **Flow cytometry**

373 Antibodies and clones used for phenotyping are listed in supplementary table 1. Secondary  
374 staining was performed with streptavidin BUV630 (BD Biosciences) and Live/Dead Aqua  
375 (Invitrogen). After surface staining, peripheral blood mononuclear cells (PBMC) were fixed  
376 and permeabilized using FoxP3/Transcription Factor staining kit (eBioscience).

377 Samples were analyzed on a BD LSR Fortessa equipped with four lasers (BD  
378 Biosciences), and data were analyzed using FlowJo version 9.5.2 and version 10.7.1 (Tree Star  
379 Inc). UMAPs were constructed in FlowJo 10.7.1 using the UMAP plugin. For calculation of  
380 the UMAP, the following parameters were included: CXCR3, CCR7, GzmA, GzmB, Perforin,  
381 FcεR1g, NKG2C, Ki67, CD8, CD16, CD56, CD38, CXCR2, CD3, CXCR6, CD4, CD57,  
382 CCR5, CCR2, CD69, CD45RA, NKG2A, NKG2D, pan-KIR, NKp80.

383

### 384 **Degranulation assay**

385 Cells were co-cultured in R10 medium alone or in presence of K562 cells for 6 hours in the  
386 presence of anti-human CD107a (H4A3, FITC, BD Biosciences). Golgi plug and Golgi stop  
387 (BD Biosciences) were added for the last 5 hours of the assay. The PBMC were subsequently  
388 stained as described above.

389

### 390 **Principal component analysis**

391 Analyses were performed using GraphPad Prism 9 (GraphPad Software). PCs with eigenvalues  
392 greater than 1.0 (“Kaiser rule”) were used for component selection.

393

### 394 **Statistical analyses**

395 GraphPad Prism 8 and 9 (GraphPad Software) was used for statistical analyses. The statistical  
396 method used is indicated in each figure legend.

397

### 398 **Author contributions**

399 Conceptualization/study design: D.B., M.B., S.G.R., A.S.S., N.M.; Investigation: D.B., I.R.,  
400 R.V., S.F.J., S.V., J.M., N.M.; Resources: H.A., H.G., S.F.J., S.V., S.G.R., A.S.S.; Writing –  
401 original draft: D.B., N.M.; Writing – review and editing: D.B, I.R., R.V., H.A., H.G., S.F.J.,  
402 S.V., M.B., H.G.L., J.M., S.G.M., A.S.S., N.M.

403

404 **Competing interests:** The authors declare no competing financial interest.

405 **Acknowledgments**

406 We thank the volunteers who participated in the study and A. v. Kries for assistance in the  
407 laboratory.

408

## 409 References

- 410 1. Chua RL, Lukassen S, Trump S, Hennig BP, Wendisch D, Pott F, et al. COVID-19  
411 severity correlates with airway epithelium-immune cell interactions identified by  
412 single-cell analysis. *Nat Biotechnol.* 2020 Aug;38(8):970–9.
- 413 2. Gao R, Bhatnagar J, Blau DM, Greer P, Rollin DC, Denison AM, et al. Cytokine and  
414 chemokine profiles in lung tissues from fatal cases of 2009 pandemic influenza A  
415 (H1N1): role of the host immune response in pathogenesis. *Am J Pathol.* 2013  
416 Oct;183(4):1258–68.
- 417 3. Wareing MD, Lyon AB, Lu B, Gerard C, Sarawar SR. Chemokine expression during  
418 the development and resolution of a pulmonary leukocyte response to influenza A virus  
419 infection in mice. *J Leukoc Biol.* 2004 Oct;76(4):886–95.
- 420 4. Maucourant C, Filipovic I, Ponzetta A, Aleman S, Cornillet M, Hertwig L, et al.  
421 Natural killer cell immunotypes related to COVID-19 disease severity. *Sci Immunol.*  
422 2020 Aug 21;5(50):eabd6832.
- 423 5. Thevarajan I, Nguyen THO, Koutsakos M, Druce J, Caly L, van de Sandt CE, et al.  
424 Breadth of concomitant immune responses prior to patient recovery: a case report of  
425 non-severe COVID-19. *Nat Med.* Nature Publishing Group; 2020 Apr;26(4):453–5.
- 426 6. Wilk AJ, Rustagi A, Zhao NQ, Roque J, Martínez-Colón GJ, McKechnie JL, et al. A  
427 single-cell atlas of the peripheral immune response in patients with severe COVID-19.  
428 *Nat Med.* Nature Publishing Group; 2020 Jul;26(7):1070–6.
- 429 7. Zhu L, Yang P, Zhao Y, Zhuang Z, Wang Z, Song R, et al. Single-Cell Sequencing of  
430 Peripheral Mononuclear Cells Reveals Distinct Immune Response Landscapes of  
431 COVID-19 and Influenza Patients. *Immunity.* 2020 Sep 15;53(3):685–696.e3.
- 432 8. Liao M, Liu Y, Yuan J, Wen Y, Xu G, Zhao J, et al. Single-cell landscape of  
433 bronchoalveolar immune cells in patients with COVID-19. *Nat Med.* Nature Publishing  
434 Group; 2020 Jun 1;26(6):842–4.
- 435 9. Scharenberg M, Vangeti S, Kekäläinen E, Bergman P, Al-Ameri M, Johansson N, et al.  
436 Influenza A Virus Infection Induces Hyperresponsiveness in Human Lung Tissue-  
437 Resident and Peripheral Blood NK Cells. *Front Immunol.* Frontiers; 2019;10:1116.
- 438 10. Sekine T, Perez-Potti A, Rivera-Ballesteros O, Strålin K, Gorin J-B, Olsson A, et al.  
439 Robust T Cell Immunity in Convalescent Individuals with Asymptomatic or Mild  
440 COVID-19. *Cell.* 2020 Oct 1;183(1):158–168.e14.
- 441 11. Marquardt N, Kekäläinen E, Chen P, Lourda M, Wilson JN, Scharenberg M, et al.  
442 Unique transcriptional and protein-expression signature in human lung tissue-resident  
443 NK cells. *Nat Commun.* Nature Publishing Group; 2019 Aug 26;10(1):3841–12.
- 444 12. Wein AN, McMaster SR, Takamura S, Dunbar PR, Cartwright EK, Hayward SL, et al.  
445 CXCR6 regulates localization of tissue-resident memory CD8 T cells to the airways.  
446 *The Journal of experimental medicine.* Rockefeller University Press; 2019 Sep  
447 26;jem.20181308.

- 448 13. Lee JS, Park S, Jeong HW, Ahn JY, Choi SJ, Lee H, et al. Immunophenotyping of  
449 COVID-19 and influenza highlights the role of type I interferons in development of  
450 severe COVID-19. *Sci Immunol*. 2020 Jul 10;5(49):eabd1554.
- 451 14. Mudd PA, Crawford JC, Turner JS, Souquette A, Reynolds D, Bender D, et al. Distinct  
452 inflammatory profiles distinguish COVID-19 from influenza with limited contributions  
453 from cytokine storm. *Sci Adv. American Association for the Advancement of Science*;  
454 2020 Dec;6(50):eabe3024.
- 455 15. Falck-Jones S, Vangeti S, Yu M, Falck-Jones R, Cagigi A, Badolati I, et al. Functional  
456 myeloid-derived suppressor cells expand in blood but not airways of COVID-19  
457 patients and predict disease severity. *medRxiv*. 2020 2020-01-01.
- 458 16. Chu H, Chan JF-W, Wang Y, Yuen TT-T, Chai Y, Hou Y, et al. Comparative  
459 Replication and Immune Activation Profiles of SARS-CoV-2 and SARS-CoV in  
460 Human Lungs: An Ex Vivo Study With Implications for the Pathogenesis of COVID-  
461 19. *Clin Infect Dis*. 2020 Sep 12;71(6):1400–9.
- 462 17. Blot M, Jacquier M, Aho Glele L-S, Beltramo G, Nguyen M, Bonniaud P, et al.  
463 CXCL10 could drive longer duration of mechanical ventilation during COVID-19  
464 ARDS. *Crit Care. BioMed Central*; 2020 Nov 2;24(1):632–15.
- 465 18. Kumar Y, Liang C, Limmon GV, Liang L, Engelward BP, Ooi EE, et al. Molecular  
466 analysis of serum and bronchoalveolar lavage in a mouse model of influenza reveals  
467 markers of disease severity that can be clinically useful in humans. Hartl D, editor.  
468 *PLoS ONE. Public Library of Science*; 2014;9(2):e86912.
- 469 19. Peiris JSM, Yu WC, Leung CW, Cheung CY, Ng WF, Nicholls JM, et al. Re-  
470 emergence of fatal human influenza A subtype H5N1 disease. *Lancet*. 2004 Feb  
471 21;363(9409):617–9.
- 472 20. Jiang Y, Xu J, Zhou C, Wu Z, Zhong S, Liu J, et al. Characterization of  
473 cytokine/chemokine profiles of severe acute respiratory syndrome. *Am J Respir Crit  
474 Care Med*. 2005 Apr 15;171(8):850–7.
- 475 21. Zhou J, Law HKW, Cheung CY, Ng IHY, Peiris JSM, Lau Y-L. Differential  
476 expression of chemokines and their receptors in adult and neonatal macrophages  
477 infected with human or avian influenza viruses. *J Infect Dis*. 2006 Jul 1;194(1):61–70.
- 478 22. Dawson TC, Beck MA, Kuziel WA, Henderson F, Maeda N. Contrasting effects of  
479 CCR5 and CCR2 deficiency in the pulmonary inflammatory response to influenza A  
480 virus. *Am J Pathol*. 2000 Jun;156(6):1951–9.
- 481 23. Carlin LE, Hemann EA, Zacharias ZR, Heusel JW, Legge KL. Natural Killer Cell  
482 Recruitment to the Lung During Influenza A Virus Infection Is Dependent on CXCR3,  
483 CCR5, and Virus Exposure Dose. *Front Immunol. Frontiers*; 2018;9:781.
- 484 24. Ichikawa A, Kuba K, Morita M, Chida S, Tezuka H, Hara H, et al. CXCL10-CXCR3  
485 enhances the development of neutrophil-mediated fulminant lung injury of viral and  
486 nonviral origin. *Am J Respir Crit Care Med*. 2013 Jan 1;187(1):65–77.

- 487 25. Fadel SA, Bromley SK, Medoff BD, Luster AD. CXCR3-deficiency protects influenza-  
488 infected CCR5-deficient mice from mortality. *Eur J Immunol*. John Wiley & Sons, Ltd;  
489 2008 Dec;38(12):3376–87.
- 490 26. Kohlmeier JE, Miller SC, Smith J, Lu B, Gerard C, Cookenham T, et al. The  
491 chemokine receptor CCR5 plays a key role in the early memory CD8<sup>+</sup> T cell response  
492 to respiratory virus infections. *Immunity*. 2008 Jul 18;29(1):101–13.
- 493 27. Wang W, Yang P, Zhong Y, Zhao Z, Xing L, Zhao Y, et al. Monoclonal antibody  
494 against CXCL-10/IP-10 ameliorates influenza A (H1N1) virus induced acute lung  
495 injury. *Cell Res*. Nature Publishing Group; 2013 Apr;23(4):577–80.
- 496 28. Alon R, Sportiello M, Kozlovski S, Kumar A, Reilly EC, Zarbock A, et al. Leukocyte  
497 trafficking to the lungs and beyond: lessons from influenza for COVID-19. *Nature*  
498 *reviews Immunology*. Nature Publishing Group; 2020 Nov 19;8:142–16.
- 499 29. Radzikowska U, Ding M, Tan G, Zhakparov D, Peng Y, Wawrzyniak P, et al.  
500 Distribution of ACE2, CD147, CD26, and other SARS-CoV-2 associated molecules in  
501 tissues and immune cells in health and in asthma, COPD, obesity, hypertension, and  
502 COVID-19 risk factors. *Allergy*. 2020 Nov;75(11):2829–45.
- 503 30. Mao H, Tu W, Qin G, Law HKW, Sia SF, Chan P-L, et al. Influenza virus directly  
504 infects human natural killer cells and induces cell apoptosis. *Journal of virology*. 2009  
505 Sep;83(18):9215–22.
- 506 31. Gupta A, Madhavan MV, Sehgal K, Nair N, Mahajan S, Sehrawat TS, et al.  
507 Extrapulmonary manifestations of COVID-19. *Nat Med*. Nature Publishing Group;  
508 2020 Jul;26(7):1017–32.
- 509 32. Blanco-Melo D, Nilsson-Payant BE, Liu W-C, Uhl S, Hoagland D, Møller R, et al.  
510 Imbalanced Host Response to SARS-CoV-2 Drives Development of COVID-19. *Cell*.  
511 2020 May 28;181(5):1036–9.
- 512 33. (Released by National Health Commission & National Administration of Traditional  
513 Chinese Medicine on March 3, 2020). Diagnosis and Treatment Protocol for Novel  
514 Coronavirus Pneumonia (Trial Version 7). *Chin Med J (Engl)*. 2020 May  
515 5;133(9):1087–95.

516

## 517 **Figure legends**

518 **Figure 1: Altered composition of NK cells and T cells expressing different lung-homing**  
519 **receptors in peripheral blood in acute viral infection. (a)** Uniform manifold approximation  
520 and projection (UMAP) analysis of NK and T cell subsets in healthy controls (HC) and COVID-  
521 19 patients. 15 healthy controls and 10 COVID-19 patients were included in the analysis with  
522 3,000 cells of each donor. Concatanated HC data were downsampled to 30,000 events. **(b)**  
523 Chemokine receptor-positive cells (blue) in HC (left plot) or COVID-19 patients (right plot)  
524 were defined by applying a Boolean algorithm ( $CXCR2^+$  OR  $CXCR3^+$  OR  $CXCR6^+$  OR  $CCR2^+$   
525 OR  $CCR5^+$ ) on data from (a). **(c)** Receptor-positive lymphocytes in HC (upper panel) and  
526 COVID-19 patients (lower panel) are indicated in blue, using the dataset from (a). **(d, f)**  
527 Representative overlays and **(e, g)** summary of data of chemokine receptor expression on **(d, e)**  
528  $CD56^{dim}CD16^+$  and  $CD56^{bright}CD16^-$  blood NK cells in HC and COVID-19 patients (upper  
529 panel) or influenza patients (lower panel). ( $CXCR3$ : n = 14;  $CXCR6$ : n = 12;  $CCR2$ : n = 18;  
530  $CCR5$ : n = 18. HC: n = 12), or on **(f, g)**  $CD4^+CD8^-$  and  $CD4^-CD8^+$  T cells in peripheral blood  
531 of HC and COVID-19 patients (n = 10) (upper panel) or influenza patients (lower panel;  
532  $CXCR3$ : n = 18;  $CXCR6$ : n = 13;  $CCR2$ : n = 18;  $CCR5$ : n = 18. HC: n = 12). **(h)** PCA plots  
533 showing the distribution and segregation of healthy controls and COVID-19 and influenza  
534 patients, respectively based on expression of chemokine receptors ( $CXCR3$ ,  $CXCR6$ ,  $CCR2$ ,  
535  $CCR5$ ) on  $CD56^{bright}CD16^-$  and  $CD56^{dim}CD16^+$  NK cells (left) and  $CD4^+$  and  $CD8^+$  T cells  
536 (right), respectively. Each dot represents one donor. **(i)** PCA plots showing corresponding  
537 trajectories of key receptors on NK and T cell subsets that influenced the group-defined  
538 segregation. **(j)** Dot plot showing the distribution of donors in PC2 for NK cells (left) and T  
539 cells (right). **(k)** Transcript expression of chemokine receptors in peripheral blood of HC (n =  
540 3) and patients with moderate COVID-19 (n = 13) and influenza (n = 4) in NK cells (left),  $CD4^+$   
541 T cells (middle), and  $CD8^+$  T cells (right). **(l)** Dot plots showing the average transcript  
542 expression of chemokine receptors on NK cells from healthy controls and COVID-19 and



543 influenza patients. (k, l) Dataset derived from a publicly available scRNA-seq dataset (7). (e, g,  
544 j) Kruskal-Wallis rank-sum test with Dunn's post hoc test for multiple comparisons. \* $p < 0.05$ ,  
545 \*\* $p < 0.005$ , \*\*\*\* $p < 0.0001$ .

546

547 **Figure 2: Lung-homing receptor-positive NK cells display an activated phenotype in**  
548 **peripheral blood of COVID-19 and influenza.** Chemokine receptor-positive cells in COVID-  
549 19 and influenza patients were identified using the Boolean gate “CXCR3<sup>+</sup> OR CXCR6<sup>+</sup> OR  
550 CCR2<sup>+</sup> OR CCR5<sup>+</sup>” (see representative gates in Figure S1b). Cells lacking all of these receptors  
551 were identified as chemokine receptor-negative. (a) Representative overlays and (b) summary  
552 of data showing CD69 and CD38 on chemokine receptor-positive/negative CD56<sup>dim</sup>CD16<sup>+</sup>  
553 and CD56<sup>bright</sup>CD16<sup>-</sup> blood NK cells from COVID-19 patients (upper panel; n = 5-10) and  
554 healthy controls (lower panel; n = 20). (c, f) Heatmaps displaying the ratio of mean expression  
555 of (c) CD69, CD38, Ki67, and NKG2D between COVID-19 patients and healthy controls or (f)  
556 of CD69 and CD38 between influenza patients and healthy controls in CR<sup>-</sup> and CR<sup>+</sup>  
557 CD56<sup>dim</sup>CD16<sup>+</sup> and CR<sup>+</sup> CD56<sup>bright</sup>CD16<sup>-</sup> NK cells. Baseline value = 1 (white). (d)  
558 Representative overlays and (e) summary of data of CD69 and CD38 expression on CR<sup>+</sup> and  
559 CR<sup>-</sup> CD56<sup>dim</sup>CD16<sup>+</sup> and CD56<sup>bright</sup>CD16<sup>-</sup> blood NK cells from influenza patients (upper panel;  
560 n = 4-12) and healthy controls (lower panel; n = 12), respectively. (g) Representative overlays  
561 and (h) summary of data of CXCR2 expression on CR<sup>-</sup> and CR<sup>+</sup> CD56<sup>dim</sup>CD16<sup>+</sup> and  
562 CD56<sup>bright</sup>CD16<sup>-</sup> NK cells from COVID-19 patients (orange; n = 5) and healthy controls (grey;  
563 n = 16), respectively. Box and Whiskers, min to max, mean shown as '+'. Kruskal-Wallis rank-  
564 sum test with Dunn's post hoc test for multiple comparisons. \*\* $p < 0.005$ .

565

566 **Figure 3: Circulating lung-homing receptor-positive T cells are phenotypically activated**  
567 **in COVID-19 and influenza.** (a, b) Expression of (a) CD69, CD38, and Ki67 on CR<sup>-</sup> and CR<sup>+</sup>  
568 CD4<sup>+</sup> and CD8<sup>+</sup> T cells from COVID-19 patients (upper panel; n = 10) and healthy controls



569 (lower panel; n = 21) or **(b)** of CD69, and CD38 on CR<sup>-</sup> and CR<sup>+</sup> CD4<sup>+</sup> and CD8<sup>+</sup> T cells from  
570 influenza patients (upper panel; n = 12) and healthy controls (lower panel; n = 12). **(c)** Heatmaps  
571 displaying the ratio of mean expression of CD69, CD38, and Ki67 between COVID-19 patients  
572 and healthy controls (top) or of CD69 and CD38 between influenza patients and healthy  
573 controls (bottom) in CR<sup>-</sup> and CR<sup>+</sup> CD4<sup>+</sup> and CD8<sup>+</sup> T cells. Baseline value = 1 (white). **(d, e)**  
574 Expression of effector molecules in CR<sup>-</sup> and CR<sup>+</sup> CD4<sup>+</sup> and CD8<sup>+</sup> T cells from **(d)** COVID-19  
575 patients (upper panel; n = 10) and healthy controls (lower panel; n = 21), or **(e)** from influenza  
576 patients (upper panel; n = 8 (GzmA/B), n = 11 (perforin)) and healthy controls (lower panel; n  
577 = 12). **(f)** Heatmaps displaying the ratio of mean expression of effector molecules between  
578 COVID-19 patients (top) or influenza patients (bottom) and healthy controls in CR<sup>-</sup> and CR<sup>+</sup>  
579 CD4<sup>+</sup> and CD8<sup>+</sup> T cells. Baseline value = 1 (white). (a, b, d, e) Box and whiskers, min to max,  
580 mean is indicated as '+'. Kruskal-Wallis rank-sum test with Dunn's post hoc test for multiple  
581 comparisons. \*p<0.05, \*\*\*\*p<0.0001.

582

583 **Figure 4: Upregulation of cytotoxic profile in circulating NK cells and CD8<sup>+</sup> T cells in**  
584 **COVID-19. (a)** SPICE analysis of CD56<sup>bright</sup>CD16<sup>-</sup> NK cells (left), CD56<sup>dim</sup>CD16<sup>+</sup> NK cells  
585 (middle), and CD8<sup>+</sup> T cells (right) in COVID-19 patients (upper panel) and influenza patients  
586 (lower panel) and the respective healthy controls, displaying co-expression of effector  
587 molecules in CR<sup>-</sup> and CR<sup>+</sup> cells. n = 10/21 (COVID/healthy), n= 6/12 (influenza/healthy) **(b)**  
588 Violin plots of indicated genes encoding granzyme A, granzyme B, and perforin in NK cells  
589 and **(c)** CD8<sup>+</sup> T cells from peripheral blood of healthy controls and non-ventilated and ventilated  
590 COVID-19 patients (6). **(d)** Dot plots of indicated genes in total BAL fluid cells, and **(e)** NK  
591 cells as well as CD4<sup>+</sup> and CD8<sup>+</sup> T cells from healthy controls and moderate and severe COVID-  
592 19 patients. **(f)** Violin plots of indicated genes in BAL fluid NK cells and **(g)** in CD8<sup>+</sup> T cells  
593 in healthy controls and moderate and severe COVID-19 patients. **(h)** Representative dot plots  
594 showing CD107a and Ki67 expression in bulk NK cells from peripheral blood of a healthy

595 control (HC) and a COVID-19 patient following stimulation with K562 cells. **(i)** Frequencies  
596 of CD107a expression in CD56<sup>bright</sup> and CD56<sup>dim</sup> NK cells of healthy controls (n = 6) or  
597 COVID-19 patients (n = 7) following 6 hour-incubation with or without K562 target cells. **(j)**  
598 Correlation analysis of CD107a expression frequencies in CD56<sup>dim</sup> and CD56<sup>bright</sup> NK cells (n  
599 = 7) versus time since symptom onset in COVID-19 patients. (d-g) RNAseq dataset derived  
600 from Liao *et al.* (8).

601

602



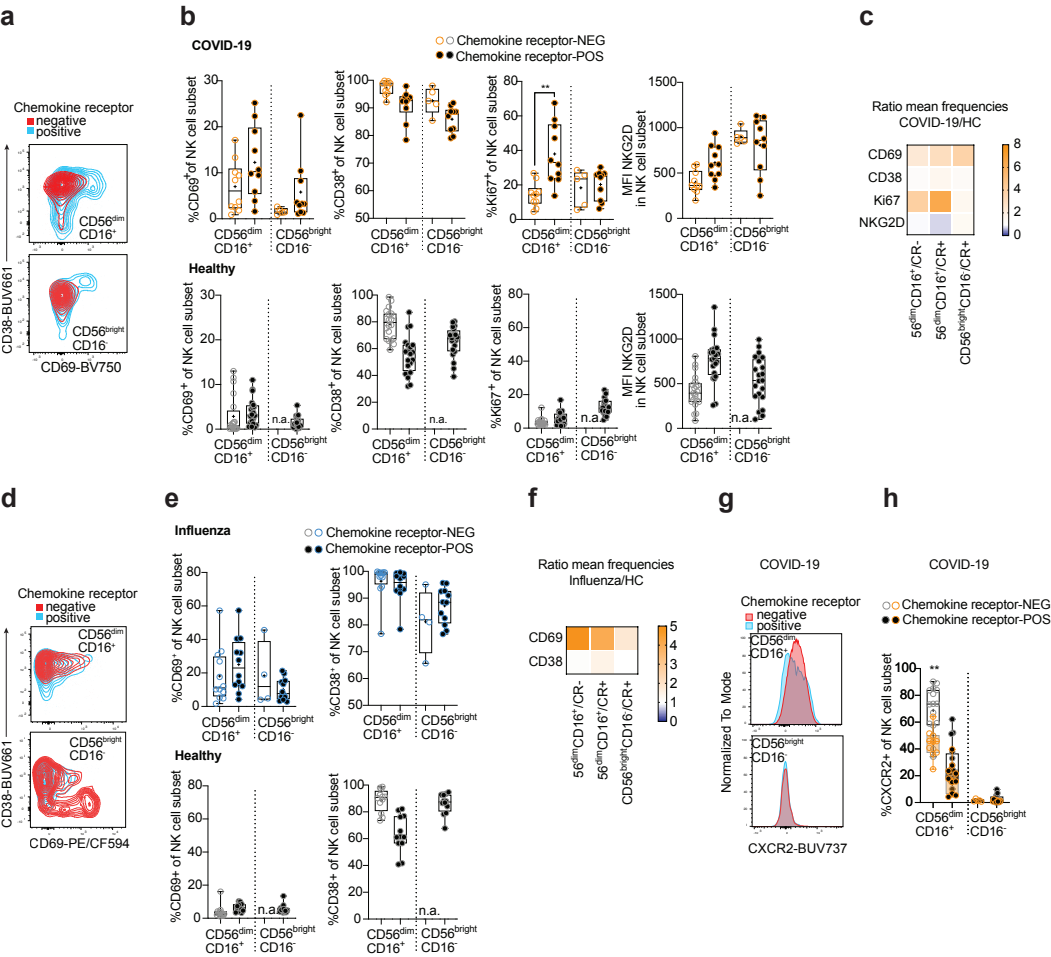

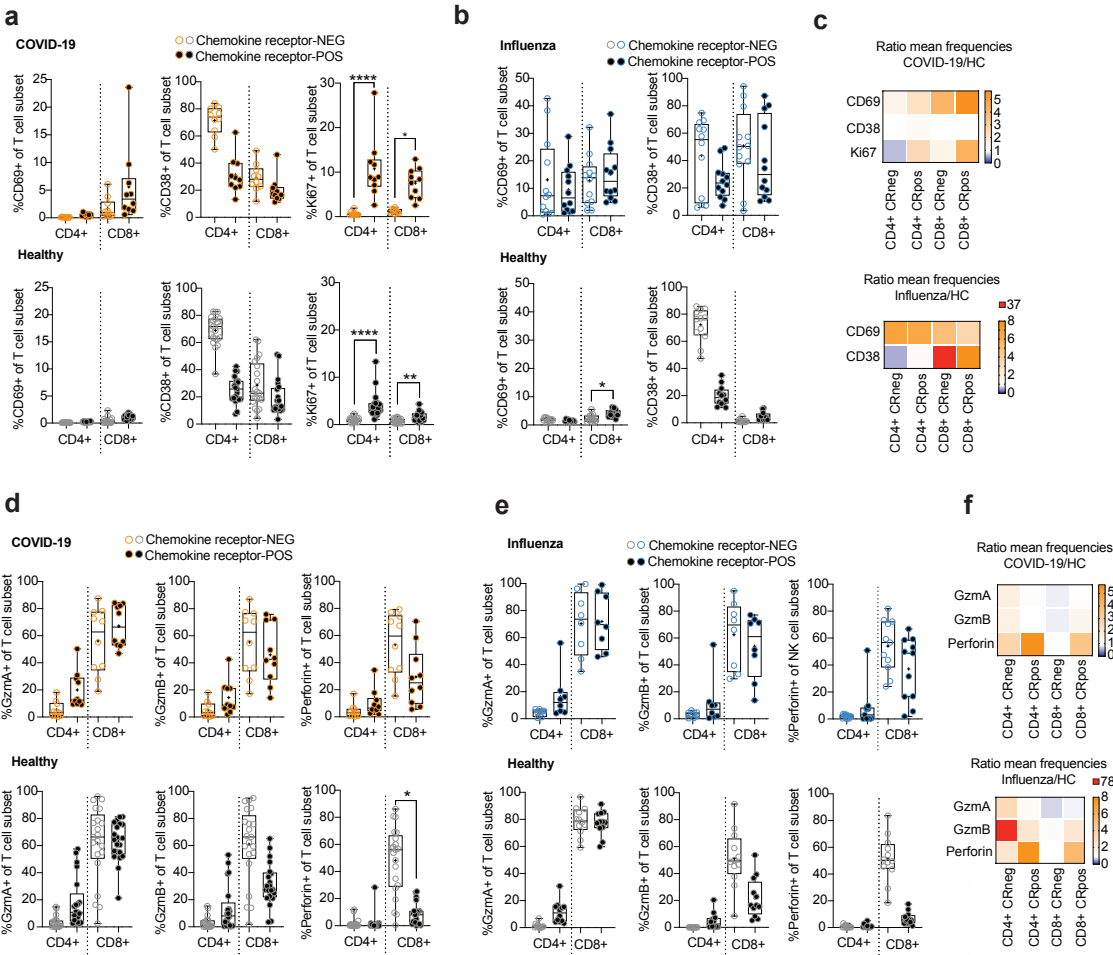

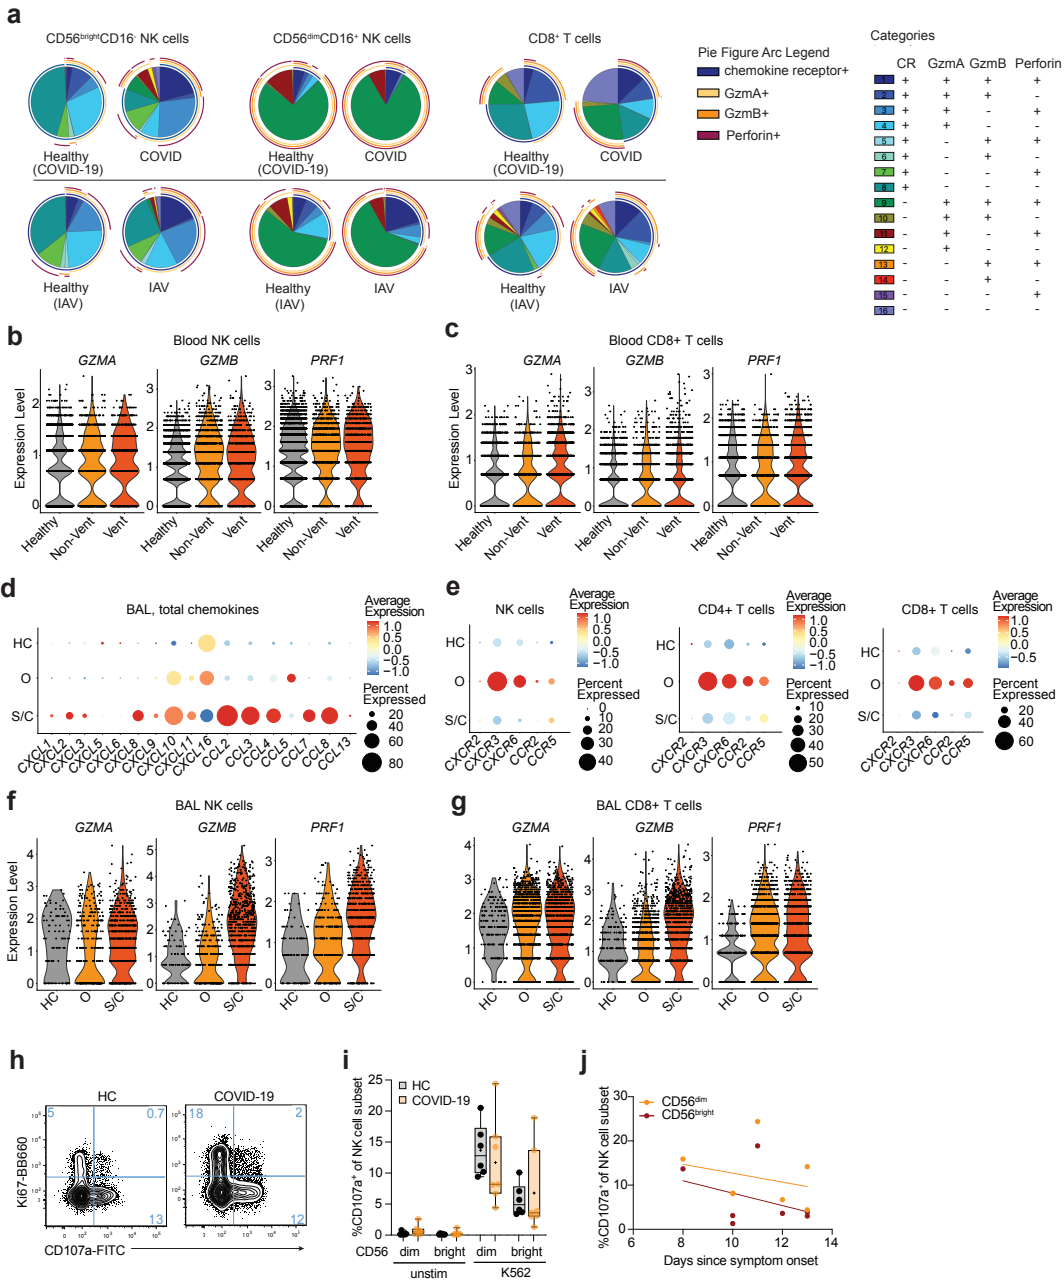

Source: https://www.biorxiv.org/content/10.1101/2021.01.13.426553v1.full.pdf
